# Supplementary material for: Small molecule inhibition of apicomplexan FtsH1 disrupts plastid biogenesis in human pathogens
Source: eLife. 2017 Aug 18;6:e29865. doi: 10.7554/eLife.29865 (PMC5576918; doi:10.7554/eLife.29865)
Supplement: Figure 1—source data 1. [file elife-29865-fig1-data1.xlsx]

## Sheet: Sheet1
EC50 (uM) after a single lytic cycle (48h) or two lytic cycles (96h)
Name	48h	48h + IPP	96h	96h + IPP		purchased	solubilized
enoxacin	>50	>25	5.7	12		Santa Cruz Biotech	water
ciprofloxacin	24	18	6	7		Fluka	0.003M HCl
levofloxacin	70	32	16	15		Sigma	water
norfloxacin	40	21	10	10		Fluka	0.06M HCl
novobiocin	40	51	36	44		Sigma	water
coumeramycin	20	13	18	14		Sigma	10% DMSO
mericitabine	>200	>200	>200	>200		Mark Smith, Stanford	60% ethanol
2'deoxy-2-F-cytidine	>200	>200	>200	>200		Mark Smith, Stanford	water
gemcitibine	5	5	5	5		Mark Smith, Stanford	water
ADEP1a	1.5	1.3	1.5	1.5		Kim Lewis, Northeastern	DMSO
Beta-lactone 4	1	1	3	3		Jason Sello, Brown	DMSO
Beta- lactone 7	2	1	3	2		Jason Sello, Brown	DMSO
rifampin	1	1	2	2		Sigma	ethanol
actinonin	3.2	60.7	2.7	72		Sigma	ethanol
Data for malaria box compounds can be found at https://doi.org/10.1101/134338
