# Supplementary material for: Small molecule inhibition of apicomplexan FtsH1 disrupts plastid biogenesis in human pathogens
Source: eLife. 2017 Aug 18;6:e29865. doi: 10.7554/eLife.29865 (PMC5576918; doi:10.7554/eLife.29865)
Supplement: Figure 1—source data 2. [file elife-29865-fig1-data2.xlsx]

## Sheet: Sheet1
Numerical Data for Figure 1 (and Figure 1-Supplements)
Figure 1-Supplement 1b (includes data for Figure 1b)
Cell cycles	actinonin					chloramphenicol					fosmidomycin					actionin + IPP					chloramphenicol + IPP					fosmidomycin + IPP
0	94.12	92.14	114.433	81.3597	81.1403	113.9	78.6	112.371	86.8421		96.26	95.63				94.29	99.07	110.309	87.7193	84.6491	92.86	96.3	107.732	82.2368		101.9	108.8
1	12.12	18.69	48.9796	23.7149	23.9205	74.55	81.46	79.5918	80.9458		4.55	5.45				93.76	81.85	84.6939	69.294	69.6367	112.48	89.11	84.6939	80.6031			92.74
2	1.89	2.04	18.1269			4.05	4.55	45.9215			0.41	0.93				54.16	57.02	75.8308			62.02	56.85	78.5499			76.48	82.2
3	1.17	2.36				1.87	3.09				0.54	0.82				62.51	60.74				68.36	61.78				89.4	88.64
Figure 1-Figure Supplement 2a (includes data for Figure 1c)
Life cycles	control + IPP																			actinonin + IPP																			chloramphenicol + IPP
0	1.132871*	0.7800318*	1.131638*	1.564206*	0.6053316*	1.056119*	1.356762*	0.6287298*	1.172283*	1.855215*	1*	1.121397*	1*	1*	1*					1.13287	0.780032	1.13164	1.56421	0.605332	1.05612	1.35676	0.62873	1.17228	1.85522	1	1.1214	1	1	1	1	1	1	1	1.13287	0.780032	1.13164	1.56421	0.605332	1.05612	1.35676	0.62873	1.17228	1.85522	1
1	0.8388567*	0.847127*	1.407226*	0.9796861*	1.329131*	0.7679717*	1.357246*	1.232513*	0.5977915*		1.434524*	1.0899*	1.62*	1.45*	0.77*	1*	1*	1*	1*	0.112462	0.09228	0.0700845	0.126564	0.125899	0.0788995	0.217154	0.0816572	0.0891175		0.47991	0.38438	0.4	0.37	0.22	0.03	0.11	0.12	0.13	1.01283	0.488962	0.35274	0.567204	0.529784	0.351759	0.779635	0.394706	0.395011		1.24686
2	1.33093*	0.8829307*	0.8509775*	0.9500423*	1.049027*	1.003391*	2.387094*	0.2978403*	1.406524*	0.9685136*	0.7709366*	0.7414193*	0.91*	1.25*	0.71*	0.65*	0.79*	1.22*	0.79*	0.0181392	0.013294		0.0276735	0.0207027	0.0135319	0.0292945	0.0111559	0.0156342	0.16004	0.0470366	0.0492218	0.05	0.06	0.0006	0.01	0.02	0.02	0.02		0.102842	0.0661277	0.0785728	0.119268	0.0833999	0.0699191	0.0917814	0.0858875	0.329825	0.239506
3	0.6053661*	1.247732*	1.323917*	1.308442*	1.08522*	0.7042517*	2.790041*	1.71774*	0.2086565*							0.35*	0.74*	0.66*	0.73*				0.0119426	0.00495904	0.00511691	0.0196119	0.0147984	0.0130586							0	0	0.01	0.01	0.0206011	0.01832	0.0127308	0.02265	0.0189909	0.0167262	0.0762091	0.0598288	0.0576673
																0.31*	0.88*	0.92*	1.14*
Figure 1-Figure Supplement 1a
log[drug]	actinonin 72 h			actinonin+IPP 72 h
0.0305	86.5672	120.682	112.58	96.6592	98.2183	98.441
0.0914	95.5224	120.256	123.028	100.891	100.668	111.136
0.274	89.9787	120.043	111.301	99.3319	99.3319	111.136
0.823	94.6695	103.838	106.183	97.5501	97.3274	114.477
2.47	63.5394	85.0746	91.4712	97.5501	97.3274	96.882
7.41	11.0874	14.4989	15.9915	96.4365	98.441	112.249
22.22	9.16844	10.2345	10.0213	89.755	98.2183	87.5278
66.67	8.95522	13.4328	13.6461	50.3341	43.8753	54.5657
200	7.88913	10.4478	7.88913	14.2539	13.5858	12.9176
Figure 1-Figure Supplement 3c
[Actinonin uM]	4uM aTC									2uM aTC									1uM aTC									0.5uM									0.25uM aTC									0.125uM aTC
40	26.1364	23.0437	20.8284	30.292	36.216	33.3879	16.0734	12.7188	14.7734	15.625*	12.53001*	15.08259*	24.57421*	24.4617*	18.75614*	16.80405*	12.66206*	13.87801*	16.05114*	12.67403*	12.06608*	26.64234*	22.02612*	19.24714*	15.45523*	12.5485*	13.31841*	14.34659*	11.95391*	10.34235*	24.57421*	18.53159*	19.44353*	16.12964*	12.77562*	12.75881*	14.77273*	10.94575*	10.19871*	25.42579*	20.64949*	19.73813*	13.6568*	10.95864*	11.69558*	12.21591*	10.80173*	11.4915*	22.38443*
20	26.9886	19.7312	18.6737	40.146	32.7215	32.7005	20.4009	16.0121	17.7392	17.89773*	14.25828*	13.21523*	27.37226*	25.62654*	21.70213*	17.08505*	15.95533*	15.66872*	16.19318*	13.39414*	11.63515*	34.18491*	23.19096*	25.33552*	16.29824*	13.62733*	14.77336*	14.20455*	12.81805*	12.06608*	27.73723*	21.28486*	24.05892*	17.42226*	17.37485*	13.54225*	12.64205*	9.217475*	9.193201*	28.22384*	26.05012*	23.07692*	14.38741*	16.86382*	16.00448*	11.64773*	10.51368*	36.48552*	28.46715*
10	30.2557	22.6116	25.2813	44.4039	33.6746	36.6285	40.0712	44.232	27.3083	25.28409*	18.29093*	16.0881*	29.07543*	26.36781*	25.04092*	50.91795*	37.81584*	18.57862*	26.5625*	17.57081*	15.51353*	40.14598*	29.01518*	28.18331*	22.14313*	24.07495*	17.68327*	23.29545*	18.57897*	14.50802*	33.45499*	26.36781*	27.39771*	47.20869*	52.40844*	19.3061*	21.44886*	17.57081*	41.51305*	32.23844*	29.86234*	28.6743*	18.15287*	20.441*	44.43201*	22.15909*	16.13058*	12.20972*	34.18491*
5	66.6193	55.7369	59.1812	46.472	60.2542	47.3322	77.6133	94.426	87.1852	80.53977*	66.97072*	59.32487*	44.40389*	49.45288*	38.39607*	43.49944*	93.34721*	61.89144*	78.40909*	68.26692*	54.44099*	54.37956*	50.51183*	46.05564*	90.48333*	38.95145*	91.27029*	72.58523*	67.40279*	60.90496*	50.72993*	47.54677*	46.44844*	102.1169*	76.93764*	90.82261*	65.19886*	58.7614*	55.73378*	54.74453*	50.51183*	53.91162*	38.55376*	56.83732*	47.95747*	75.14204*	67.83485*	59.75581*	58.15085*
2.5	118.75	93.0389	103.28	72.2628	72.6438	76.9885	91.4387	93.1201	88.0806	103.4091*	100.8161*	100.2633*	67.39659*	71.05542*	67.07037*	105.5452*	100.2177*	98.71293*	100.4261*	108.8814*	101.5561*	83.57664*	78.89163*	79.14893*	109.1982*	97.09473*	98.54504*	105.2557*	100.5281*	102.418*	79.31873*	82.28027*	77.38134*	114.6497*	109.6432*	109.0095*	89.20454*	101.2482*	100.407*	94.6472*	105.8948*	94.56628*	110.4908*	115.3781*	106.0436*	92.04546*	100.8161*	101.4125*	94.03893*
1.25	114.915	115.218	108.882	88.0779	76.9855	97.6105	101.105	98.7981	100.224	120.0284*	104.5607*	97.39047*	80.65694*	75.18532*	71.58756*	114.2563*	101.9211*	107.1069*	119.7443*	105.8569*	104.5727*	94.89051*	85.13943*	89.9509*	112.4578*	108.9051*	112.535*	113.4943*	103.2645*	101.2689*	84.06326*	81.22132*	86.51391*	117.9655*	119.5798*	108.0022*	100.142*	97.79165*	98.10869*	101.2165*	99.22343*	100.7529*	121.6186*	106.4067*	119.9776*	105.1136*	112.482*	100.8379*	95.13382*
Figure 1-Figure Supplement 3d
	Actinonin			Chloramphenicol			Actinonin + Chloramphenicol
One cycle	28.6089	26.5487	29.6371	92.126	73.6726	85.2823	30.7087	25	24.3952
Two cycles	16.1435	17.7037	10.1996	26.4574	31.5587	19.5122	17.0404	13.0853	12.4169
[truncated: 71 more columns]
