# Supplementary material for: Small molecule inhibition of apicomplexan FtsH1 disrupts plastid biogenesis in human pathogens
Source: eLife. 2017 Aug 18;6:e29865. doi: 10.7554/eLife.29865 (PMC5576918; doi:10.7554/eLife.29865)
Supplement: Figure 2—source data 2. [file elife-29865-fig2-data2.xlsx]

## Sheet: Sheet1
Numerical Data for Figure 2 (and Figure 2-Supplements)
Figure 2b
[Actinonin uM]	Parent		D-3 mutant		0.7-3 mutant		2-2 mutant
3.16	0.817666	1.18233	1.16893	0.831071	0.843145	1.15685	0.965288	1.03471
10	0.60127	0.592757	0.92563	1.06838	1.09367	0.921265	1.0805	0.919179
20	0	0.00575207	0.585677	0.785325	0.854921	0.982368	0.987539	0.733436
40	0	0	0.518748	0.336781	0.748202	0.898069	0.520213	0.506665
80	0	0	0.00592807	0	0	0.0220212	0.0222981	0.0129792
100	0	0	0	0	0	0	0	0
Figure 2c
Actinonin [uM]	deltaKu80		FtsHn805s		RH parent		2-2 mutant		FtsHwt
3.16	100*	100*	100	100	100*	100*	100	100	100	100
10	69.87447*	76.28069*	99.9043	123.145	131.4134*	115.4294*	131.227	99.124	90.7595	101.564
20	3.844723*	9.56943*	109.733	78.7475	16.56999*	16.70992*	108.625	97.9693	0.433959	11.453
40	0*	0*	64.3783	59.8547	0*	0*	81.1793	92.6339	0	0
80	0*	0*	0	0	0*	0*	3.49085	5.42007	0	0
100	0*	0*	0	0	0*	0*	0	0	0	0
Figure 2-Figure Supplement 1a
Lytic cycle 1
Hours	Control			Clindamycin (25nM)			Pyrimethamine (4uM)			EY0725 (40uM)
12	56	43	59	40	71	42	48	31	12	57	56	44
24	225	161	217	158	201	204	115	41	4	193	144	192
36	793	935	790	600	585	655	13	8	8	560	623	593
Lytic cycle 2
Hours	Control			Clindamycin (25nM)			Pyrimethamine (4uM)			EY0725 (40uM)
12	35	26	31	30	36	35	8	4	6	20	22	25
24	167	178	179	25	26	33	6	10	4	107	103	102
36	599	572	716	6	7	10	1	1	3	28	18	48
Figure 2-Figure Supplement 1b
Days	WT						Pyrimethamine 4uM						Clinda 4nM						Act 40uM						Act 80uM						Act 20uM
1	118	217	199	171	208	163	87	63					186	207					170	144					150	134					163*	163*
2	2961	5232	4427	3821	6004	4331	-108	242					3597	3854					2595	2314					1314	1497					3353*	2887*
3	10170	11879	12535	11588	13868	12788	424	722					9670	9548					6972	7163					3083	3650					15413*	13748*
4	17151	24622	25741	19288	26887	28555	751	1200					11552	11216					10282	11066					3623	4225					20964*	20809*
5	31158	33448	36647	31225	36739	39061	1074	1381					12866	12059					11416	12164					3880	4511					21704*	21386*
6	30915	33889	37673	33090	36625	39565	1533	1754					13259	12261					11048	11776					3796	4432					20653*	20711*
