# Supplementary material for: Small molecule inhibition of apicomplexan FtsH1 disrupts plastid biogenesis in human pathogens
Source: eLife. 2017 Aug 18;6:e29865. doi: 10.7554/eLife.29865 (PMC5576918; doi:10.7554/eLife.29865)
Supplement: Figure 3—source data 1. [file elife-29865-fig3-data1.xlsx]

## Sheet: Sheet1
SMG493		ggtacgtcataaggatactcacagatc				Reverse Primer for sequencing LHR fragment. Can also be used for integration check if used Myc or flag tag
SD_gRNA seq primer F3		ctatggaatactaaatatatatccaatggcccc				gRNA sequencing primer; binds to tetR dozi cassette.
		cggtctcagtggtgtacggtacaaac				3' integraion check primer binding to sgRNA cassette; Common forward primer for RHR sequencing
		ggtttaccgagctcttattggttttcaaac				LHR sequencing common primer Forward
		tggataagacgagagattgggtattag				RHR sequencing common primer Reverse
FtsH primers
RHR primers
SMG501		gtacggtacaaacccggaattcgagctcgg taagaatatttataaatgtataatttgtattattttttc												FtsH1 LHR Forward
SMG502		gattgggtattagacctagggataacagggtaat cacatgacaatgtatatattgaattttatc												FtsH1 LHR Reverse
SMG503		gtacggtacaaacccggaattcgagctcgg aaattacattaatattcatcattcagagaagaataataaatg												PF3D7_1119600 LHR Forward
SMG504		gattgggtattagacctagggataacagggtaat cttctttgccagtatgtattaaaag												PF3D7_1119600 LHR Reverse
SMG505		gtacggtacaaacccggaattcgagctcgg taataactacataaatacagacacatacac												PF3D7_1464900 LHR Forward
SMG506		gattgggtattagacctagggataacagggtaat cacatacaactaaagtgtatcactgtac												PF3D7_1464900 LHR Reverse
LHR Primers
SMG476		ttcaaacttcattgactgtgccggccggccaggtaaggtagaaatgttaaaaaatgatac												FtsH1 RHR Forward
SMG477		gttcttgtcgagagagttgttagaagacttctcattattatcagccacgattttattttc												FtsH1 RHR Reverse
SMG481		ttttcaaacttcattgactgtgccggccggccTACAGACCACATTCAGAATGTTTAGCAC												PF3D7_1119600 RHR Forward
SMG507		tcatttatcatcatcatctttataatccgcgatcgcTCTTAGTTTCACATTGGATATTTTATTATCC												PF3D7_1119600 RHR Reverse
SMG495		ttttcaaacttcattgactgtgccggccggcccctttgcctgatattaaagggagatatg												PF3D7_1464900 RHR Forward
SMG496		CGA CGC CGT AGT TCA TGA CGA GAG ACT GAG CAA TAT GTG TTG CCT TTT GTA AAT CAC TTG												PF3D7_1464900 RHR Reverse
SMG514		taacggtcctaaggtagcgaataatacgactcactatagggaagtcatctaataatagct												FtsH1 gRNA Primer 1
SMG515		attttaacttgctatttctagctctaaaacagctattattagatgacttccctatagtgagtc												FtsH1 gRNA Primer 2
SMG516		taacggtcctaaggtagcgaataatacgactcactataggagttatacggtggataatta												PF3D7_1119600 gRNA Primer 1
SMG517		ccttattttaacttgctatttctagctctaaaactaattatccaccgtataactcctatagtgagt												PF3D7_1119600 gRNA Primer 2
SMG518		ctataacggtcctaaggtagcgaataatacgactcactatagggaaattaaattagcaatgca												PF3D7_1464900 gRNA Primer1
SMG519		tattttaacttgctatttctagctctaaaactgcattgctaatttaatttccctatagtgagtcgt												PF3D7_1464900 gRNA Primer 2
Parental plasmid pSN054 used for regulating PfFtsH1 levels: GCGTATAATGGACTATTGTGTGCTGATAAGGAGAACATAAGCGCAGAACAATATGTATCTATTCCGGTGTTGTGTTCCTTTGTTATTCTGCTATTATGTTCTCTTATAGTGTGACGAAAGCAGCATAATTAATCGTCACTTGTTCTTTGATTGTGTTACGATATCCAGAGACTTAGAAACGGGGGAACCGGGATGAGCAAGGTAAAAATCGGTGAGTTGATCAACACGCTTGTGAATGAGGTAGAGGCAATTGATGCCTCAGACCGCCCACAAGGCGACAAAACGAAGAGAATTAAAGCCGCAGCCGCACGGTATAAGAACGCGTTATTTAATGATAAA…
KAJ1		ACCGCGGTGGCGGCCGCGTTGTGTGAAGCCCCGTT
KAJ2		GTTACGAGAACTCATGTGGTCGAAGAGAAAACT
KAJ3		ATGAGTTCTCGTAACGGCGGGAGTCCTGCACGC
KAJ4		ACGAACGGTAGAATTCTATTCGTCTCGCGTAATAG
KAJ5		GAATTCTACCGTTCGTATAGCATACATTATACGAA
KAJ6		AAGCTTTACCGTTCGTATAATGTATGCTATACGAA
KAJ7		ACGAACGGTAAAGCTTAGGCAGTTCAAACGAAAGC
KAJ8		GGTACGGGGCCCGTTAACACTTTCACAGGTCACGCC
KAJ9		GAGCAATGGAGCGAGCAGCG
KAJ10		AAAGCGTCCCGACCAAAGAT
KAJ11		GAGTCTGGACAGCGCTGTGTGTTTTAGAGCTAGAAATAGC
KAJ12		CAACTTGACATCCCCATTTAC
PDF primers
SMG373		acatgtggtgatgttgaagaaaatccaggtccatggcca ATG TTA ATG TAC TAC AGC TTA TTC CTG T
SMG374		ttcttcgctaatcagtttctgttcggtaaccgcCAG GGC CGG CTC CTC GCT GTG TG
Plasmid pMG96 used to induce PDF levels :agcttcgtacgctgcaggtcgagatttccccgaaaagtgccacctgggtccttttcatcacgtgggacattgtttaaacgagcagggacgtgcgcagctcaggggcatgatgtgactgtcgcccgtacatttagcccatacatccccatgtataatcatttgcatccatacattttgatggccgcacggcgcgaagcaaaaattacggctcctcgctgcagacctgcgagcagggaaacgctcccctcacagacgcgttgaattgtccccacgccgcgcccctgtagagaaatataaaaggttaggatttgccactgaggttcttctttcatatacttccttttaaaatcttgctagg…
