# Supplementary material for: Small molecule inhibition of apicomplexan FtsH1 disrupts plastid biogenesis in human pathogens
Source: eLife. 2017 Aug 18;6:e29865. doi: 10.7554/eLife.29865 (PMC5576918; doi:10.7554/eLife.29865)
Supplement: Figure 3—source data 2. [file elife-29865-fig3-data2.xlsx]

## Sheet: Sheet1
Numerical Data Figure 3 (and Figure 3 Supplements)
Figure 3-Figure Supplement 2a (includes data for Figure 3b)
cycle number	FtsH -atc -ipp		FtsH +atc - ipp		FtsH -atc + ipp		FtsH +atc + ipp
0	82.37	150	69.87	147.44	90.06	219.23	100	100
1	86.77	67.07	92.04	73.96	105.72	87.31	100	100
2	80.52	39.03	91.29	80.54	104.1	98.76	100	100
3	36.46	24.29	90.75	79.59	86.74	94.98	100	100
4	26.94	16.62	88.53	65.55	100.05	60.08	100	100
Figure 3c
cycle	FtsH + atc + ipp																		FtsH -atc + ipp
0	1.9175	1.83528	1.23916	1.58513	0.827582	1.3294				0.829262	0.467493	0.389867	1.18548	1.0032	0.825634	0.936768	1.11621	0.60101	1.9175	1.83528	1.23916	1.58513	0.827582	1.3294							1.25106	0.772681	0.446345	0.556956	0.476304	0.144536
1	0.881947	0.684698	0.755498	1.0561	0.656783	0.838614	1.2125	0.877582	1.01425	0.709089	0.490438	0.377977	1.67297	0.913454	0.842437	0.344571	1.05672	0.726295	0.700881	0.849274	0.648027	1.82851	0.908651	0.948774	1.09377	0.685442	0.737929	0.15913	0.187522	0.264362	0.299132	0.171875	0.210987	0.219501	0.297177	0.270751
2	1.34433	0.956387		1.07596	0.895465	0.905096	1.36461	1.22509	0.99547	0.780125	0.44768	0.446327	2.59857	1.38623	1.62764	1.28235	2.74741	1.0208	0.550453	0.4398	0.587584	0.313117	0.282396	0.390345	0.391658	0.476603	0.471433	0.228776	0.153441	0.201652	0.269964		0.150738	0.311846	0.151638	0.00688327
3	1.01286	1.02079	0.975498	1.16887	0.939327	0.960317	1.1599	1.09256	0.615713				0.58782	1.47711	1.20636	1.85653	0.722365	0.854536	0.434238	0.280298	0.256896	0.381823	0.315584	0.228682	0.354422	0.201417	0.210423	0.084087		0.0327166	0.167116	0.122863	0.0764956	0.13576	0.103138	0.142772
4	1.56034	1.52514	1.77912	1.41506	1.60255	1.09186	1.26217	1.18581	0.785532	1.32349	0.511281	0.70811	1.58546	1.38787	0.955906	1.27191	0.911748	0.600722	0.104067	0.0829061	0.0918095	0.0639425	0.123436	0.923437	0.149416	0.0978648	0.0921875				0.0556055	0.0512732	0.0374999	0.0483545	0.0380963	0.0302747
Figure 3-Figure Supplement 2b (includes data for Figure 3d)
log[drug uM]	FtsH + atc -ipp						FtsH -atc -ipp						FtsH -atc + ipp						FtsH + atc + ipp						NF54 + atc						NF54 - atc
0	89.94	94.85	115.21	102.21	95.95	101.83	82.31	99.19	118.5	87.12	105.41	107.48	87.6*	95.11*	117.29*	91.84*	92.71*	115.45*	88.98*	102.16*	108.86*	87.14*	90.03*	122.83*	92.15	105.55	102.3	105.48	96.92	97.6	86.97	104.83	108.2	95.01	104.59	100.4
0.0305	94.85	92.69	121.08	94.91	96.62	118.33	76.68	90.47	107.91	90.42	99.21	125.15	80.17*	93.16*	109.5*	87.31*	94.06*	119.6*	96.44*	116.56*	114.42*	94.47*	96.53*	110.55*	88.11	112.84	98.36	92.44	95.57	110.09	85.12	101.89	108.31	87.18	93.79	95.68
0.0914	81.68	79.88	108.98	95.2	90.08	111.79	77.01	84.96	94.45	91.15	96	106.65	81.47*	84.53*	111.44*	88.27*	93*	113.52*	85.63*	103.91*	111.6*	90.55*	96.22*	119.94*	88.4	106.04	97.47	99.37	83.08	87.69	82.95	106.89	109.18	89.61	99.87	93.12
0.274	74.61	79.04	103.83	95.48	84.77	109.32	70.83	70.06	92.68	58.39	57.04	73.68	91.68*	88.99*	126.48*	91.17*	82.01*	112.66*	87.3*	100.33*	106.58*	98.9*	99.52*	123.14*	88.7	110.78	101.91	95.43	85.79	88.24	91.22	92.09	105.04	88.12	92.31	95.28
0.823	75.45	87.31	116.53	105.53	87.52	104.39	36.74	38.4	44.46	29.25	28.11	39.06	101.33*	108.57*	142.44*	89.91*	88.08*	123.35*	90.35*	102.62*	124.86*	93.54*	110.86*	117.26*	88.5	108.61	102.69	94.48	89.46	87.29	83.16	101.02	112.12	85.16	87.99	89.34
2.47	75.57	82.04	109.46	115.49	88.56	111.98	28.14	35.31	45.68	17.67	15.71	20.67	84.16*	83.14*	111.26*	87.79*	98.49*	111.79*	90.27*	91.8*	99.49*	110.66*	137.57*	116.33*	88.3	102.79	106.24	95.97	90.81	91.49	90.78	106.46	113.21	89.74	92.98	111.34
7.41	74.97	83.47	117.49	87.71	81.07	99.08	30.34	27.91	39.61	11.26	15.81	14.47	88.8*	92.42*	121.37*	86.64*	89.24*	110.54*	87.68*	101.55*	113.51*	91.47*	106.74*	119.73*	35.28	49.87	43.46	59.73	64.34	61.36	37.23	48.66	55.62	65.05	63.56	66.53
22.22	65.63	56.89	95.21	36.31	26.83	41.81	24.71	26.7	32.11	11.68	11.99	14.78	88.06*	88.9*	107.64*	77.1*	70.64*	93.09*	84.79*	85.93*	111.15*	89.31*	92.51*	120.56*	15.97	15.57	15.28	19.82	21.31	22.13	15.89	16.98	15.89	24.7	28.07	29.28
66.67	21.32	22.28	32.57	12.04	13.46	15.74	23.72	28.91	31.34	12.3	11.47	15.19	65.7*	62.36*	72.47*	45.2*	32.38*	52.91*	53.71*	46.17*	57.97*	41.46*	47.75*	56.2*	10.74	14.09	13.3	19	18.87	20.23	13.93	15.13	20.68	20.51	29.01	30.5
200	18.56	18.92	22.87	6.92	7.77	10.62	17.65	19.42	24.49	8.37	8.78	13.33	21.34*	22.27*	27.28*	12.72*	12.14*	15.52*	21.18*	20.11*	24.53*	11.24*	12.89*	17.94*	11.14	9.56	11.53	16.7	19.28	21.31	12.52	12.3	15.67	17.68	22	23.21
Figure 3-Figure Supplement 2c
fos (uM)	+ atc, no IPP			- atc, no IPP			+ atc, + IPP			- atc, + IPP
0	92.36	107.24	100.4	90.42	103.13	106.45	90.08	104.08	105.83	90.91	90.15	118.94
0.0045	98.99	98.89	89.35	88.37	111.05	123.46	89.26	104.08	102.33	85.26	103.83	110.92
0.0137	96.28	101.31	94.07	90.42	95.8	110.56	87.2	102.95	102.95	88.97	99.1	110.83
0.0412	92.36	99.8	93.27	98.53	124.83	158.06	93.79	105.11	106.66	88.72	91.59	111.93
0.1234	94.47	97.59	99.3	79.96	92.96	120.43	86.89	103.47	109.33	84.58	102.64	111.85
0.37	89.25	99.9	109.85	68.13	85.63	90.22	90.49	96.05	104.19	80.44	95.55	104.67
1.11	46.73	51.66	53.17	38.42	44.57	46.14	89.57	88.54	102.64	87.37	87.54	103.57
3.333	12.56	13.77	14.67	14.37	16.62	19.06	88.33	96.36	96.88	81.37	103.83	101.13
10	11.36	12.86	12.36	13.29	11.83	14.37	86.07	96.57	100.38	81.8	92.77	107.79
30	12.16	10.65	11.46	13.29	11.93	14.08	89.88	108.92	99.76	91.59	103.15	123.24
Figure 3-Figure Supplement 2d
[chlor]	FtsH1 -atc -ipp			FtsH1 + atc -ipp			FtsH1 - atc + ipp			FtsH1 +atc + ipp			parent -atc -ipp			parent + atc -ipp			parent -atc + ipp			parent + atc + ipp
0	97.98	92.8	109.22	91.66	116.13	92.2	99.8*	93.27*	106.93*	96.85*	100.41*	102.73*	104.89	92.75	102.35	97.89	99.5	102.61	91.79*	109.1*	99.11*	97.36*	97.05*	105.6*
0.03	90.35	79.25	108.07	84.92	93.82	86.99	98.29*	85.44*	96.18*	84.77*	96.52*	89.07*	91.76	88.94	89.36	79.02	96.07	93.71	78.98*	110.37*	105.87*	93.96*	83.45*	89.73*
0.09	94.09	76.08	103.75	70.88	84.11	81.14	89.56*	84.94*	75.5*	83.03*	102.32*	96.44*	93.88	95.01	102.49	85.35	93.28	102.07	96.43*	102.49*	108.96*	84.07*	78.81*	96.43*
0.2	98.13	96.25	113.4	86	112.26	107.68	100*	90.76*	101.51*	88.41*	94.29*	88.66*	89.79	93.04	91.62	79.02	87.28	90.81	88.41*	100.66*	109.81*	87.57*	86.33*	91.69*
0.8	88.33	101.87	126.08	86.54	103.63	110.46	93.98*	91.57*	96.29*	84.27*	102.15*	108.69*	93.04	95.44	95.44	94.67	95.64	94.03	97.42*	107.13*	121.49*	85.61*	93.44*	102.3*
2.4	92.36	93.95	103.17	80.96	94.81	96.79	106.73*	98.59*	111.24*	95.86*	104.14*	141.14*	111.53	91.62	101.93	81.17	98.53	106.04	113.89*	121.21*	116.99*	94.68*	119.61*	127.03*
7.4	80.84	83.72	94.67	82.94	100.84	99.67	96.69*	84.94*	92.97*	89.82*	95.36*	92.05*	102.92	99.25	113.22	99.5	97.46	110.86	99.95*	100.66*	120.08*	87.88*	99.42*	149.79*
22	26.51	33.14	40.06	39.31	51.09	51	103.21*	97.49*	106.63*	88.49*	101.82*	116.47*	71.29	77.36	79.2	82.99	79.66	92.74	100.52*	104.6*	93.48*	95.19*	102.4*	136.3*
66	15.99	23.92	24.64	25.46	30.85	48.04	102.91*	97.39*	100.6*	92.05*	108.53*	124.34*	39.81	43.62	44.05	50.29	54.36	53.82	105.73*	104.04*	107.84*	91.17*	98.59*	140.83*
200	14.27	20.46	16.28	18.53	20.24	22.49	83.13*	94.48*	103.41*	91.8*	111.01*	117.05*	25.41	24.99	36.42	28.95	36.99	38.92	113.33*	114.73*	114.31*	92.2*	104.26*	129.5*
