# Supplementary material for: Small molecule inhibition of apicomplexan FtsH1 disrupts plastid biogenesis in human pathogens
Source: eLife. 2017 Aug 18;6:e29865. doi: 10.7554/eLife.29865 (PMC5576918; doi:10.7554/eLife.29865)
Supplement: Figure 4—source data 1. [file elife-29865-fig4-data1.xlsx]

## Sheet: Sheet1
Numerical Data for Figure 4 (and Figure 4 Supplements)
Figure 4b
WT
14.447
14.1527
16.0769
Figure 4c
WT	0.00581765	0.00970126
D810A	0.0115555	0.00675229
Figure 4d
Log[inhibitor uM]	actinonin +atc				actinamide +atc				actinonin -atc				actinomide -atc
0	100	100	100	100					100	100	100	100
0.0305	102.33	95.66	99.36	92.88					102.57	89.32	113.84	104.76
0.0914	99.82	94.11	100	87.6					90.32	82.84	108.6	110.12
0.274	120.65	103.72	93.64	85.77					54.55	58.84	105	104.66
0.823	102.33	99.22	90.46	80.96					32.02	25.57	49.65	52.78
2.47	95.33	103.1	92.79	80.87					18.77	18.39	23.95	25.4
7.41	66.79	73.64	77.94	74.13					13.04	13.31	15.35	16.07
22.22	17.06	21.71	26.09	32.21					12.25	10.51	13.26	15.28
66.67	13.46	14.26	11.35	10.29					13.44	12.61	12.44	11.41
200	10.23	12.71	9.54	8.56					9.09	9.46	8.72	7.94
0					100		100	100					100	100	100	100
0.015					107.59	116.71	81.26	92.67					95.18	90.21	88.22	72.75
0.045					95.7		80.24	111.31					82.98	91.06	98.04	117.01
0.14					101.77	128.48	100.09	88.87					84.82	88.09	87.43	122.56
0.41					94.81	117.85	70.87	82.51					78.01	69.79	97.64	123.4
1.23					105.7	117.22	92.3	93.73					41.13	38.72	90.49	178.6
3.7					93.54	93.42	84.23	110.16					26.24	35.74	100.31	132.18
11.11					101.39	97.72	82.47	108.39					19.01	19.57	52.87	91.3
33.33					85.06	88.86	90.17	101.33					17.02	18.72	20.35	36.34
100					80.38	82.53	87.01	100.27					11.63	15.74	16.42	27.48
Figure 4e
[inhibitor]	actinonin			actinamide
100	4.33864	4.6501	-13.1069	7.40392	11.4649	12.7356
33.33	7.18392	8.98012	-10.7346	14.2805	25.6486	21.2836
11	9.55353	13.2324	2.54462	42.0699	41.3645	44.7402
3.6	18.5785	18.7264	4.35736	60.2086	67.4374	64.4469
1.2	37.9827	31.0066	26.4614	73.6623	76.0514	75.9217
0.41	53.9723	60.9998	64.7741	85.5226	83.572	82.8801
0.13	75.6281	78.482	78.3274	88.3128	94.24	88.1843
0.045	89.7824	88.4889	94.1923	91.5926	99.0494	92.7365
0.015	102.622	96.2987	93.2534	91.7642	104.169	92.3384
