# Supplementary figures and images for: Small molecule inhibition of apicomplexan FtsH1 disrupts plastid biogenesis in human pathogens
Source: eLife journal article supplement (doi:10.7554/elife.29865), 2017-08-18

A

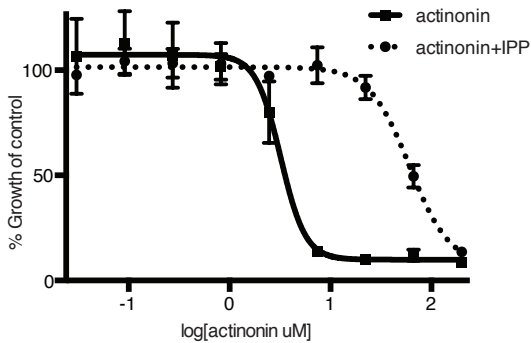

B

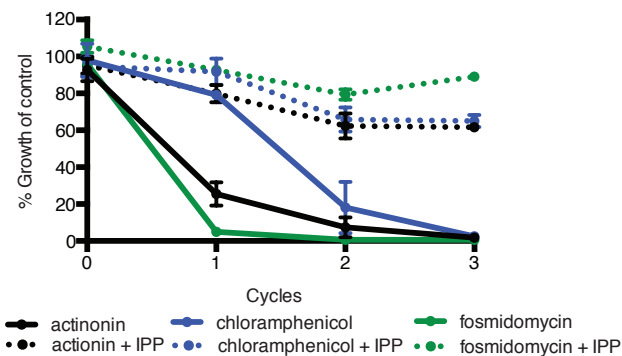

Supplement: supp [file elife_poa_e29865_Figure_1_Figure_Supplement_1.pdf › elife_poa_e29865_Figure_1_Figure_Supplement_1.pdf]

**A**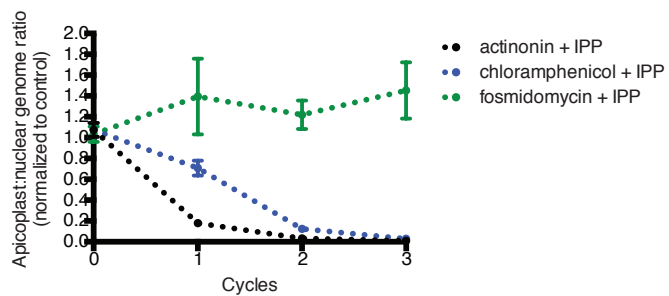**B**

Control + IPP

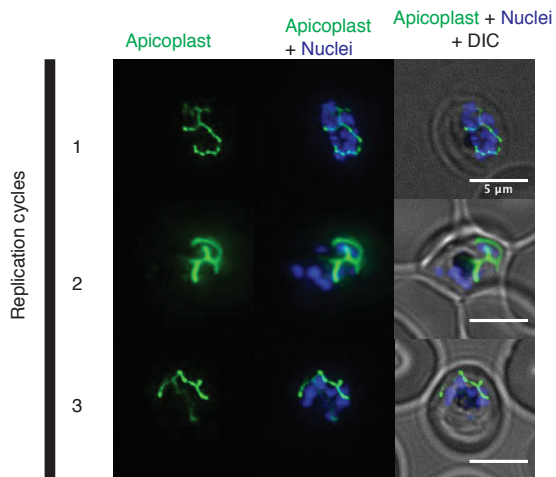**D**

Fosmidomycin + IPP

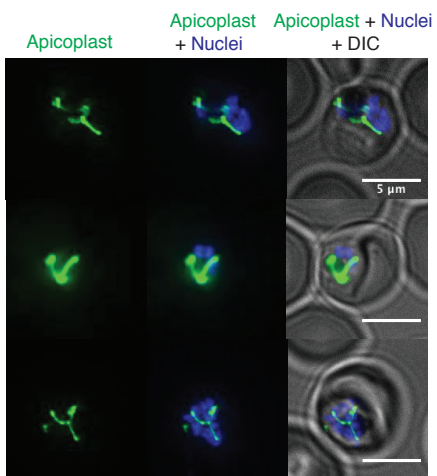**C**

Chloramphenicol + IPP

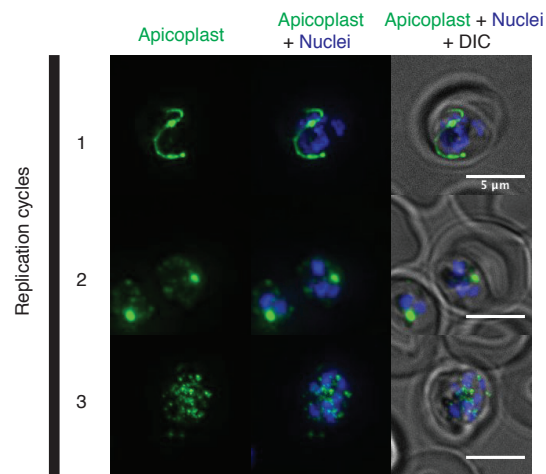**E**

Actinonin + IPP

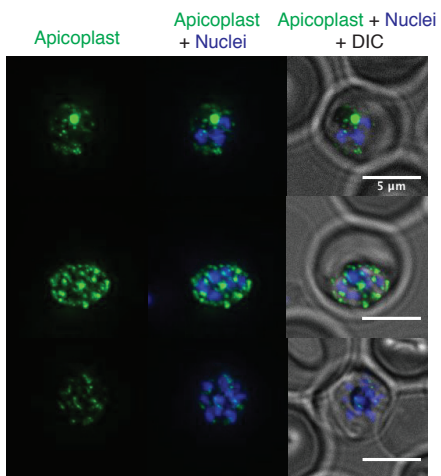

Supplement: supp [file elife_poa_e29865_Figure_1_Figure_Supplement_2.pdf › elife_poa_e29865_Figure_1_Figure_Supplement_2.pdf]

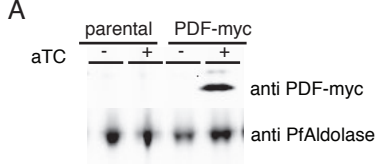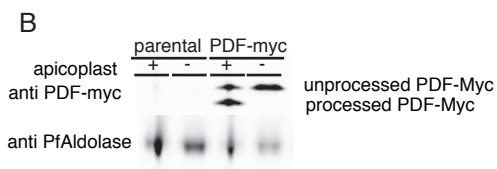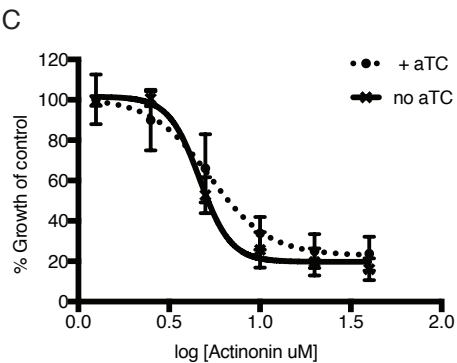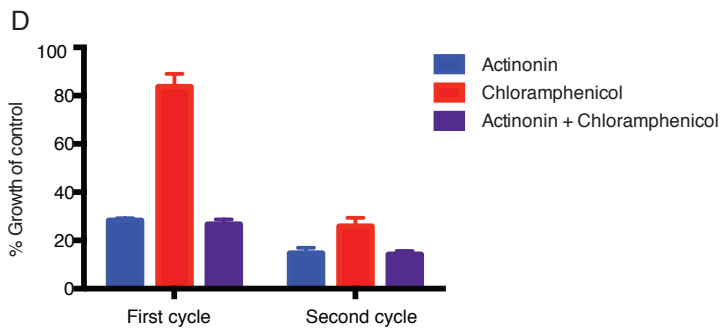

Supplement: supp [file elife_poa_e29865_Figure_1_Figure_Supplement_3.pdf › elife_poa_e29865_Figure_1_Figure_Supplement_3.pdf]

A

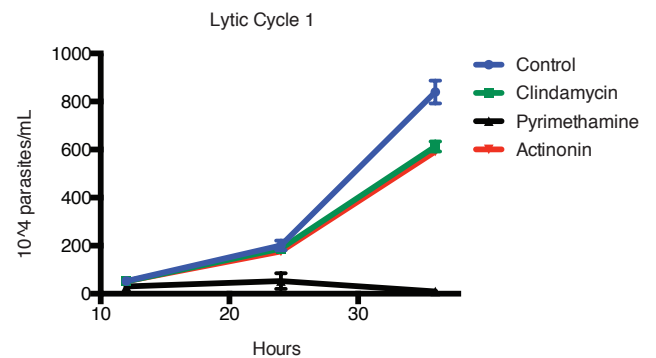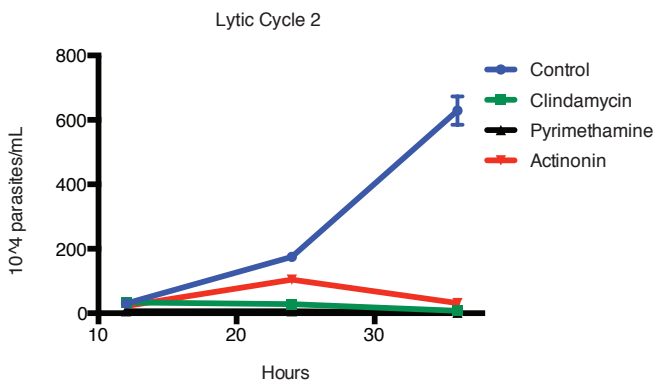

B

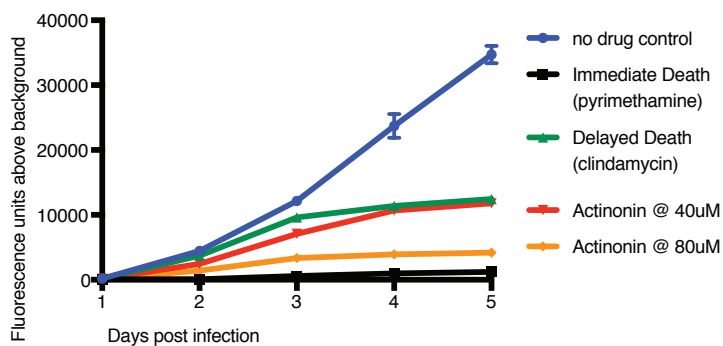

Supplement: supp [file elife_poa_e29865_Figure_2_Figure_Supplement_1.pdf › elife_poa_e29865_Figure_2_Figure_Supplement_1.pdf]

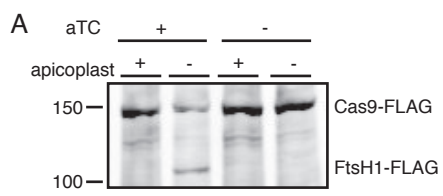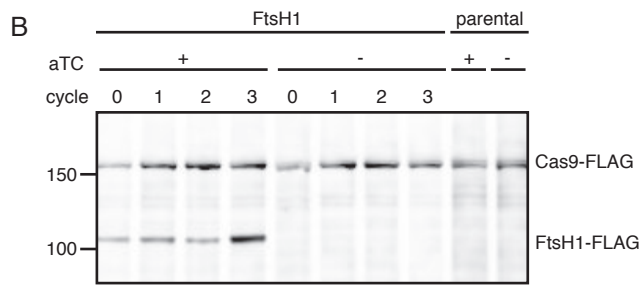

Supplement: supp [file elife_poa_e29865_Figure_3_Figure_Supplement_1.pdf › elife_poa_e29865_Figure_3_Figure_Supplement_1.pdf]

A

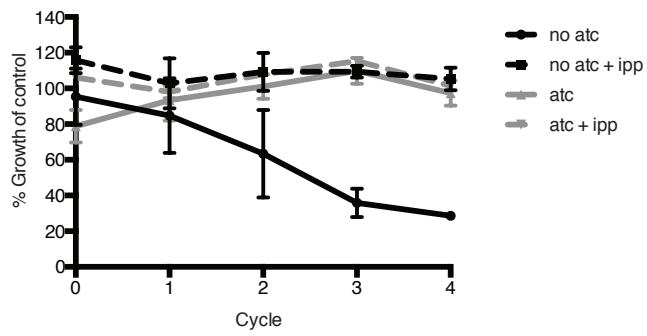

B

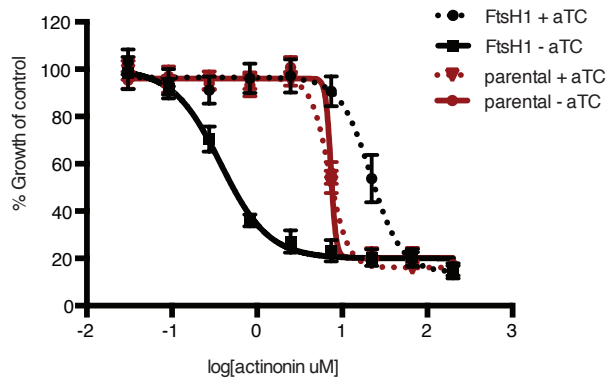

C

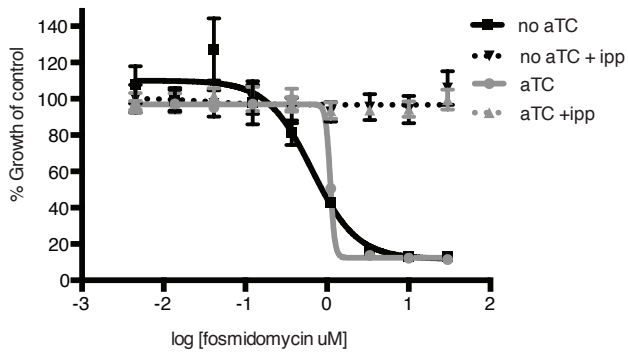

D

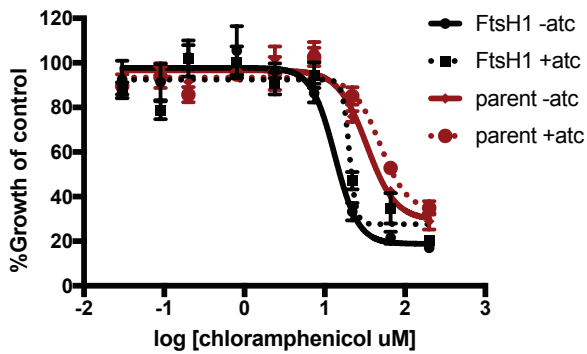

Supplement: supp [file elife_poa_e29865_Figure_3_Figure_Supplement_2.pdf › elife_poa_e29865_Figure_3_Figure_Supplement_2.pdf]

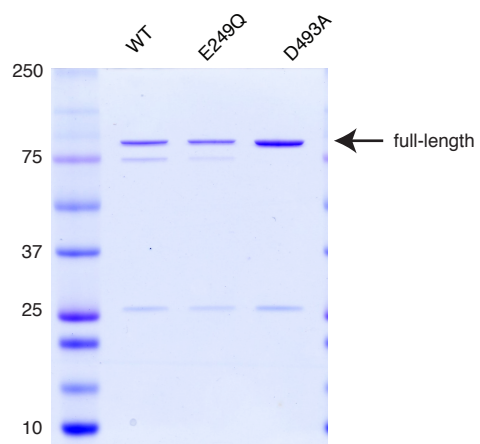

Supplement: supp [file elife_poa_e29865_Figure_4_Figure_Supplement_1.pdf › elife_poa_e29865_Figure_4_Figure_Supplement_1.pdf]
